# Supplementary material for: Anatomical, functional, and blood-born predictors of severity of brachycephalic obstructive airway syndrome severity in French Bulldogs
Source: Front Vet Sci. 2025 Jan 9;11:1486440. doi: 10.3389/fvets.2024.1486440 (PMC11754203; doi:10.3389/fvets.2024.1486440)
Supplement: Supplementary file 2 [file Table_1.XLSX]

## Sheet: Raw dataset
dog	country_origin	FCI	age_days	age_months	nostrils_grade	snout_length	cranial_length	skull_length	skull_width	eye_width	neck_length	neck_girth	chest_girth	body_length	CFR	EWR	SI	NGR	NLR	sex	neutered	weight	BCS	temp_5min_pre	temp_5min_post	grade_5min	temp_3min_pre	temp_3min_post	grade_3min	temp_3min_diff	temp_5min_diff
AE88	Switzerland	no	802	26.733	3	20	140	160	190	55	180	380	570	600	0.142857143	0.289473684	1.1875	0.666666667	0.3	male	no	13.2	4	NA	NA	3	NA	NA	3	NA	NA
AH70	Imported	yes	534	17.8	2	23	110	133	220	55	110	350	520	320	0.209090909	0.25	1.654135338	0.673076923	0.34375	female	no	9.4	3	38.1	38.1	1	38.1	38.3	1	0.2	0
AM86	Imported	no	524	17.467	1	NA	NA	NA	NA	NA	NA	NA	NA	NA	NA	NA	NA	NA	NA	male	no	17.1	3	38	38.1	2	37.8	38	2	0.2	0.1
AP56	Imported	yes	610	20.333	2	25	110	135	220	50	130	335	540	310	0.227272727	0.227272727	1.62962963	0.62037037	0.419354839	female	no	9.5	5	38.8	38.9	0	38.6	38.9	0	0.3	0.1
BB37	Imported	no	1574	52.467	2	40	110	150	260	55	160	400	630	390	0.363636364	0.211538462	1.733333333	0.634920635	0.41025641	female	yes	15.6	5	38.7	38.9	0	38.8	39	0	0.2	0.2
BJ63	Imported	no	415	13.833	2	37	120	157	230	59	150	400	590	390	0.308333333	0.256521739	1.464968153	0.677966102	0.384615385	female	no	15.5	5	38.2	38.5	0	38.3	38.5	1	0.2	0.3
BU57	Switzerland	yes	1486	49.533	2	47	210	257	225	60	178	420	520	530	0.223809524	0.266666667	0.875486381	0.807692308	0.335849057	female	no	11.3	4	37.8	38	2	38	38.2	2	0.2	0.2
CB71	Imported	yes	1273	42.433	3	25	110	135	240	60	130	445	635	370	0.227272727	0.25	1.777777778	0.700787402	0.351351351	male	no	15	5	38.2	38.2	0	38.3	38.4	2	0.1	0
CU30	Switzerland	yes	761	25.367	2	23	105	128	220	52	120	330	540	290	0.219047619	0.236363636	1.71875	0.611111111	0.413793103	female	no	9.5	5	38.4	38.2	2	38.3	38.4	2	0.1	-0.2
CV17	Switzerland	yes	2073	69.1	3	20	130	150	325	20	130	435	570	380	0.153846154	NA	2.166666667	0.763157895	0.342105263	male	yes	13	6	38.5	38.4	2	38.6	39.3	2	0.7	-0.1
CW25	Switzerland	yes	712	23.733	4	20	120	140	230	50	130	370	560	320	0.166666667	0.217391304	1.642857143	0.660714286	0.40625	female	yes	11.5	4	37.7	37.4	2	38	38	2	0	-0.3
CW39	Switzerland	yes	1479	49.3	4	30	115	145	250	60	130	420	590	330	0.260869565	0.24	1.724137931	0.711864407	0.393939394	male	no	13.5	5	NA	NA	3	NA	NA	3	NA	NA
DE61	Imported	yes	2530	84.333	2	25	105	130	200	51	NA	355	515	320	0.238095238	0.255	1.538461538	0.689320388	NA	female	yes	8.6	5	38.5	38.4	1	37.5	37.7	1	0.2	-0.1
DM72	Imported	unknown	620	20.667	3	20	120	140	220	60	120	400	590	360	0.166666667	0.272727273	1.571428571	0.677966102	0.333333333	female	yes	12.8	6	38.5	39.1	3	38.5	38.8	2	0.3	0.6
DU71	Imported	no	573	19.1	2	38	170	208	190	45	150	420	470	490	0.223529412	0.236842105	0.913461538	0.893617021	0.306122449	female	yes	9.7	3	37.9	38.2	1	38.2	38.4	1	0.2	0.3
DV69	Imported	no	557	18.567	3	20	130	150	230	60	160	400	555	400	0.153846154	0.260869565	1.533333333	0.720720721	0.4	male	yes	14.1	4	38.6	38.7	2	38.7	39.3	2	0.6	0.1
EC85	Imported	no	1437	47.9	2	28	105	133	200	55	130	340	500	330	0.266666667	0.275	1.503759398	0.68	0.393939394	female	yes	8.7	4	37.7	37.5	2	38.1	38.4	2	0.3	-0.2
EE22	Switzerland	no	801	26.7	2	29	120	149	250	54	140	440	600	360	0.241666667	0.216	1.677852349	0.733333333	0.388888889	male	no	14.5	4	38.1	38.1	1	38.5	38.6	1	0.1	0
EI82	Switzerland	yes	510	17	2	30	150	180	180	50	270	300	520	540	0.2	0.277777778	1	0.576923077	0.5	female	no	10.6	5	38	38.1	1	38.2	38	1	-0.2	0.1
EO17	Imported	yes	4597	153.233	4	25	105	130	200	50	105	370	535	310	0.238095238	0.25	1.538461538	0.691588785	0.338709677	female	yes	8.9	5	37.6	37.6	1	38.3	38.4	1	0.1	0
EP34	Switzerland	yes	1806	60.2	2	23	100	123	230	54	130	410	610	300	0.23	0.234782609	1.869918699	0.672131148	0.433333333	female	no	13.8	4	38.1	37.8	2	38.1	38.2	2	0.1	-0.3
EX61	Imported	yes	488	16.267	4	35	210	245	180	50	120	400	540	560	0.166666667	0.277777778	0.734693878	0.740740741	0.214285714	female	no	11.6	4	37.7	38	2	38.6	38.7	2	0.1	0.3
FZ95	Imported	no	2226	74.2	2	25	100	125	210	45	120	350	550	330	0.25	0.214285714	1.68	0.636363636	0.363636364	female	no	14	4	37.2	37.8	1	38.3	38.3	1	0	0.6
GA43	Imported	yes	421	14.033	2	25	110	135	220	50	120	340	540	290	0.227272727	0.227272727	1.62962963	0.62962963	0.413793103	female	no	9.6	5	37.4	37.6	0	38	37.9	1	-0.1	0.2
GI74	Imported	no	383	12.767	2	20	120	140	170	50	130	360	470	490	0.166666667	0.294117647	1.214285714	0.765957447	0.265306122	female	no	10.5	4	37.8	38	2	38	38.2	2	0.2	0.2
GK18	Imported	unknown	1465	48.833	3	20	130	150	240	55	140	400	590	380	0.153846154	0.229166667	1.6	0.677966102	0.368421053	male	no	13.7	5	37.7	38.1	2	38.4	38.1	2	-0.3	0.4
HL55	Imported	yes	1036	34.533	2	24	115	139	230	52	110	385	525	320	0.208695652	0.226086957	1.654676259	0.733333333	0.34375	female	yes	10.8	5	38.3	38.1	1	38.3	38.5	1	0.2	-0.2
HP22	Imported	no	394	13.133	2	32	160	192	180	45	160	450	500	490	0.2	0.25	0.9375	0.9	0.326530612	female	no	10.2	4	38	38.2	2	37.9	38.1	2	0.2	0.2
IW63	Imported	no	1729	57.633	NA	NA	NA	NA	NA	NA	NA	NA	NA	NA	NA	NA	NA	NA	NA	male	no	16.9	5	37.5	37.7	1	38.1	38	1	-0.1	0.2
JA28	Imported	unknown	1854	61.8	2	22	110	132	220	53	140	370	550	330	0.2	0.240909091	1.666666667	0.672727273	0.424242424	female	yes	10.8	5	37.5	37.7	1	37.5	37.7	1	0.2	0.2
JD93	Imported	yes	3528	117.6	3	25	170	195	190	55	120	430	620	410	0.147058824	0.289473684	0.974358974	0.693548387	0.292682927	female	yes	13.6	5	38	38.1	1	38.2	38.4	1	0.2	0.1
JU09	Switzerland	yes	1706	56.867	2	25	115	140	230	55	110	370	560	320	0.217391304	0.239130435	1.642857143	0.660714286	0.34375	female	yes	11.2	4	38.4	38.2	2	38.5	38.5	1	0	-0.2
JW94	Switzerland	unknown	935	31.167	4	25	105	130	215	55	90	340	515	375	0.238095238	0.255813953	1.653846154	0.660194175	0.24	female	no	10	5	NA	NA	2	NA	NA	3	NA	NA
KA90	Imported	yes	747	24.9	3	25	180	205	210	50	130	410	560	340	0.138888889	0.238095238	1.024390244	0.732142857	0.382352941	male	no	12.1	5	38.2	38.2	2	37.8	38.5	2	0.7	0
LK87	Imported	unknown	2743	91.433	3	28	110	138	240	62	120	390	570	320	0.254545455	0.258333333	1.739130435	0.684210526	0.375	male	yes	12.2	5	37.8	38.1	2	38.1	38.2	2	0.1	0.3
MO24	Imported	no	2431	81.033	2	36	110	146	260	50	170	425	640	480	0.327272727	0.192307692	1.780821918	0.6640625	0.354166667	male	no	19.8	5	38.2	38.5	0	38.1	37.8	1	-0.3	0.3
MQ03	Switzerland	yes	2868	95.6	4	24	110	134	245	58	120	370	550	325	0.218181818	0.236734694	1.828358209	0.672727273	0.369230769	female	yes	11.9	6	38	37.4	1	38.2	38.4	1	0.2	-0.6
NJ76	Switzerland	yes	2340	78	2	20	105	125	240	54	120	300	540	280	0.19047619	0.225	1.92	0.555555556	0.428571429	female	no	9.8	5	37.6	37.6	2	37.2	37.7	2	0.5	0
NU48	Switzerland	yes	2058	68.6	2	20	105	125	220	55	110	380	540	320	0.19047619	0.25	1.76	0.703703704	0.34375	female	no	10.8	5	38.7	39.1	2	39	39.2	2	0.2	0.4
OK51	Imported	yes	2315	77.167	2	29	126	155	NA	60	150	420	610	473	0.23015873	NA	NA	0.68852459	0.317124736	female	yes	15.7	6	38.4	38.8	1	38.6	38.8	1	0.2	0.4
OR24	Switzerland	yes	743	24.767	3	24	120	144	260	64	130	440	640	380	0.2	0.246153846	1.805555556	0.6875	0.342105263	male	no	16.6	5	38.3	38.3	2	38.4	38.5	2	0.1	0
OT73	Switzerland	yes	764	25.467	4	30	130	160	240	55	145	410	600	315	0.230769231	0.229166667	1.5	0.683333333	0.46031746	male	no	13.9	5	NA	NA	1	NA	NA	1	NA	NA
PO39	Imported	no	776	25.867	3	25	112	137	NA	62	160	435	630	415	0.223214286	NA	NA	0.69047619	0.385542169	male	yes	15	5	NA	NA	2	NA	NA	2	NA	NA
QE64	Switzerland	yes	1473	49.1	2	25	120	145	290	25	130	390	570	400	0.208333333	NA	2	0.684210526	0.325	female	yes	13.5	5	37.8	38.1	0	38.4	38.4	0	0	0.3
QJ02	Imported	yes	3976	132.533	4	20	110	130	240	60	140	370	530	310	0.181818182	0.25	1.846153846	0.698113208	0.451612903	female	no	10.6	5	37.2	37.2	1	36.9	36.6	2	-0.3	0
QP98	Imported	no	681	22.7	2	24	330	354	163	32	110	410	650	550	0.072727273	0.196319018	0.460451977	0.630769231	0.2	female	yes	11	4	38.2	37.9	1	37.6	37.9	1	0.3	-0.3
QU07	Switzerland	yes	988	32.933	2	23	105	128	220	60	100	380	530	335	0.219047619	0.272727273	1.71875	0.716981132	0.298507463	female	yes	10.1	4	NA	NA	0	NA	NA	0	NA	NA
QV37	Switzerland	yes	624	20.8	4	25	115	140	255	64	140	410	590	350	0.217391304	0.250980392	1.821428571	0.694915254	0.4	male	no	14.5	5	38	37.8	2	37.8	37.9	2	0.1	-0.2
RH36	Imported	unknown	1364	45.467	2	20	110	130	240	60	130	410	600	350	0.181818182	0.25	1.846153846	0.683333333	0.371428571	female	no	14.6	7	37.5	38	2	37.8	37.6	1	-0.2	0.5
RK44	Imported	yes	1789	59.633	3	20	130	150	200	43	135	370	560	430	0.153846154	0.215	1.333333333	0.660714286	0.313953488	female	no	11.6	4	37.9	38.1	1	37.1	38.2	2	1.1	0.2
RK53	Switzerland	no	3069	102.3	2	25	145	170	210	60	210	390	540	620	0.172413793	0.285714286	1.235294118	0.722222222	0.338709677	male	yes	14.3	4	38	37.7	1	37.8	37.9	1	0.1	-0.3
SF76	Imported	no	773	25.767	2	20	110	130	240	50	120	370	560	390	0.181818182	0.208333333	1.846153846	0.660714286	0.307692308	female	no	12.6	5	38	38.2	0	38.3	38.5	1	0.2	0.2
SP50	Imported	no	371	12.367	2	20	170	190	120	30	120	340	460	470	0.117647059	0.25	0.631578947	0.739130435	0.255319149	female	yes	8.6	3	37.8	38	1	38.4	38.6	1	0.2	0.2
SQ53	Switzerland	no	394	13.133	2	44	170	214	190	45	140	380	560	540	0.258823529	0.236842105	0.887850467	0.678571429	0.259259259	male	no	13.5	4	38	38.4	1	37.9	38.1	1	0.2	0.4
SV23	Imported	unknown	2314	77.133	2	30	120	150	195	50	160	420	610	450	0.25	0.256410256	1.3	0.68852459	0.355555556	male	yes	14.8	5	37.9	37.7	0	37.9	37.4	0	-0.5	-0.2
TD65	Imported	no	500	16.667	2	25	140	165	190	45	130	360	530	400	0.178571429	0.236842105	1.151515152	0.679245283	0.325	female	no	11.3	4	38	38.2	2	38.6	38.6	2	0	0.2
TF71	Imported	yes	3053	101.767	2	32	180	212	210	44	160	400	560	540	0.177777778	0.20952381	0.990566038	0.714285714	0.296296296	female	yes	12.1	4	38	38.4	2	38	37.9	1	-0.1	0.4
TF85	Imported	unknown	645	21.5	2	22	90	112	200	50	95	330	510	330	0.244444444	0.25	1.785714286	0.647058824	0.287878788	female	no	8.8	5	37.5	37.7	2	37.7	37.7	2	0	0.2
TP74	Imported	yes	608	20.267	2	20	100	120	230	50	120	400	540	320	0.2	0.217391304	1.916666667	0.740740741	0.375	female	no	10.4	5	38.3	37.7	0	38.3	38.3	0	0	-0.6
TR54	Switzerland	no	389	12.967	2	24	112	136	210	54	110	365	510	290	0.214285714	0.257142857	1.544117647	0.715686275	0.379310345	female	no	9.4	4	37.9	38	1	38	37.8	2	-0.2	0.1
TU55	Switzerland	unknown	396	13.2	1	25	100	125	220	52	130	370	550	320	0.25	0.236363636	1.76	0.672727273	0.40625	male	yes	11.1	4	37.4	38	1	37.8	37.6	2	-0.2	0.6
TV31	Imported	no	629	20.967	1	32	240	272	190	45	120	340	480	380	0.133333333	0.236842105	0.698529412	0.708333333	0.315789474	female	no	11	4	37.9	38.1	0	38.2	38.1	1	-0.1	0.2
UR69	Imported	unknown	800	26.667	3	23	110	133	240	50	94	360	550	350	0.209090909	0.208333333	1.804511278	0.654545455	0.268571429	female	yes	11	5	NA	NA	3	NA	NA	3	NA	NA
US61	Switzerland	yes	599	19.967	2	20	120	140	230	55	150	370	590	300	0.166666667	0.239130435	1.642857143	0.627118644	0.5	female	no	12.5	4	38.5	38.7	1	38.6	38.6	1	0	0.2
VJ53	Switzerland	no	380	12.667	1	40	110	150	250	60	140	380	560	350	0.363636364	0.24	1.666666667	0.678571429	0.4	male	no	13.5	4	NA	NA	0	NA	NA	0	NA	NA
VM46	Switzerland	no	1221	40.7	3	28	125	153	245	55	120	440	560	375	0.224	0.224489796	1.60130719	0.785714286	0.32	male	no	13.1	4	38.1	38	0	38.1	38.1	3	0	-0.1
VR61	Imported	yes	3528	117.6	3	21	170	191	185	47	135	390	560	390	0.123529412	0.254054054	0.968586387	0.696428571	0.346153846	female	no	13.4	4	38	38.2	1	38.1	38.2	1	0.1	0.2
VY92	Switzerland	no	613	20.433	2	30	120	150	240	50	170	410	600	390	0.25	0.208333333	1.6	0.683333333	0.435897436	female	no	16.6	5	38.2	38	0	38.4	38.6	0	0.2	-0.2
WF19	Imported	yes	2705	90.167	2	25	110	135	220	55	120	375	600	330	0.227272727	0.25	1.62962963	0.625	0.363636364	female	yes	12.1	5	38.2	39	0	38.8	39	2	0.2	0.8
WG11	Switzerland	yes	1422	47.4	2	25	130	155	250	60	120	360	590	300	0.192307692	0.24	1.612903226	0.610169492	0.4	female	yes	11.4	5	38.1	38	0	38	38.3	0	0.3	-0.1
XH31	Switzerland	yes	1202	40.067	4	20	120	140	240	57	130	370	560	310	0.166666667	0.2375	1.714285714	0.660714286	0.419354839	female	no	11.2	5	38	38.1	1	38.1	38	2	-0.1	0.1
XJ80	Imported	yes	648	21.6	2	30	120	150	260	50	150	350	550	290	0.25	0.192307692	1.733333333	0.636363636	0.517241379	female	no	10.2	4	36.6	37	0	36.6	36.9	0	0.3	0.4
XW48	Imported	unknown	2767	92.233	2	22	95	117	230	52	125	370	510	340	0.231578947	0.226086957	1.965811966	0.725490196	0.367647059	female	yes	10.2	4	36.9	37.2	1	36.9	37	2	0.1	0.3
YE64	Imported	no	999	33.3	3	20	110	130	200	50	120	340	480	300	0.181818182	0.25	1.538461538	0.708333333	0.4	female	yes	7.6	4	38.2	37.8	1	38.5	38.9	1	0.4	-0.4
YM85	Imported	no	1154	38.467	2	NA	NA	NA	NA	NA	110	360	550	420	NA	NA	NA	0.654545455	0.261904762	female	yes	12.4	6	38.2	38.1	2	NA	NA	2	NA	-0.1
YN33	Switzerland	yes	1545	51.5	2	20	125	145	230	55	120	375	590	380	0.16	0.239130435	1.586206897	0.63559322	0.315789474	female	no	14.3	4	38.2	38.3	1	38.6	38.8	2	0.2	0.1
YS31	Imported	yes	1162	38.733	1	30	130	160	280	50	180	410	580	360	0.230769231	0.178571429	1.75	0.706896552	0.5	male	yes	14.5	5	37.4	37.6	0	38.1	38.3	0	0.2	0.2
YT20	Switzerland	yes	1701	56.7	3	20	105	125	230	60	85	370	535	290	0.19047619	0.260869565	1.84	0.691588785	0.293103448	female	no	9.5	5	38.3	38.6	2	38.3	38.5	2	0.2	0.3
YU62	Switzerland	yes	1191	39.7	3	32	210	242	220	54	155	420	510	500	0.152380952	0.245454545	0.909090909	0.823529412	0.31	male	no	11.2	4	37.9	38.2	2	38	38.4	2	0.4	0.3
YV05	Switzerland	yes	392	13.067	1	32	210	242	210	45	140	440	530	510	0.152380952	0.214285714	0.867768595	0.830188679	0.274509804	male	no	13.2	4	37.9	38.1	0	38.1	38.3	1	0.2	0.2
ZA23	Switzerland	yes	636	21.2	2	20	200	220	210	40	170	430	580	500	0.1	0.19047619	0.954545455	0.74137931	0.34	male	no	11	4	38.2	38.6	1	38.2	38.6	1	0.4	0.4
ZF40	Switzerland	yes	985	32.833	3	20	115	135	242	55	150	370	530	420	0.173913043	0.227272727	1.792592593	0.698113208	0.357142857	female	no	11.1	4	38.2	38.1	0	37.9	37.3	0	-0.6	-0.1
ZG59	Switzerland	yes	553	18.433	3	25	110	135	215	56	120	350	500	330	0.227272727	0.260465116	1.592592593	0.7	0.363636364	female	yes	9.6	5	37.8	37.2	1	38.2	38.2	2	0	-0.6
ZQ44	Switzerland	unknown	1016	33.867	1	35	140	175	250	60	140	460	630	460	0.25	0.24	1.428571429	0.73015873	0.304347826	male	no	16.8	5	NA	NA	0	NA	NA	0	NA	NA

## Sheet: Annotation
Variable name	Explanation	Formula	Units or range of answer options
dog	study-ID of each dog, randomly generated combination of 2 letters and 2 digits
country_origin	Swiss or Imported
FCI	whether the dog is from a breeder registered with Fédération Cynologique Internationale, according to the owner		"yes", "no", "unknown" if owners did not know
studydate	date of study appointment
age_days	age in days on day of study appointment		days
age_months	age in months on day of study appointment	age_days/30	months
nostrils_grade	visual assessment of nostril stenosis following a grading scheme		1 = open, 2 = mild stenosis, 3 = moderate stenosis, 4 = severe stenosis
snout_length	distance from the rostral end of the nasal planum to the point between the left and right medial canthus, measured with a soft tape		mm
cranial_length	distance from the point between the left and right medial canthus to the external occipital protuberance, measured with a soft tape		mm
skull_length	distance from the rostral end of the nasal planum to the external occipital protuberance, measured with a soft tape	snout length + cranial length	mm
skull_width	distance between left and right external zygomatic arch when the soft tape is placed on the head		mm
eye_width	horizontal distance from medial canthus of the right eye to medial canthus of the left eye, measured with a soft tape		mm
neck_length	distance from the external occipital protuberance to the point between the cranial angles of the scapulae, measured with a soft tape		mm
neck_girth	circumference of the neck measured halfway between the external occipital protuberance and the point between the cranial angles of the scapulae with a soft tape		mm
chest_girth	circumference of the chest measured directly behind the elbow with a soft tape		mm
body_length	distance from the point between the cranial angles of the scapulae to the root of the tail, measured with a soft tape		mm
CFR	ratio between snout length and skull length	snout length / skull_length
EWR	ratio between eye width and skull width	eye_width / skull_width
SI	ratio between skull width and skull length	skull_width / skull_length
NGR	ratio between neck girth and chest girth	neck_girth / chest_girth
NLR	ratio between neck length and body length	neck_length / body_length
sex	the dog's sex		male, female
neutered	whether the dog is neutered		yes, no
weight	body weight of the dog		kg
BCS	body condition score		integer scale from 1 = severely kachectic to 9 = severely adipose; 5 = ideal body condition
temp_5min_pre	rectal temperature measured immediately before the 5 min walking test		° C
temp_5min_post	rectal temperature measured immediately after the 5 min walking test		° C
grade_5min	BOAS grade assigned in the 5 min walking test		0 = no clinical signs of BOAS, 1 = mild BOAS, 2 = moderate BOAS, 3 = severe BOAS
temp_3min_pre	rectal temperature measured immediately before the 3 min trotting test		° C
temp_3min_post	rectal temperature measured immediately after the 3 min trotting test		° C
grade_3min	BOAS grade assigned in the 3 min trotting test		0 = no clinical signs of BOAS, 1 = mild BOAS, 2 = moderate BOAS, 3 = severe BOAS
temp_3min_diff	increase in rectal temperature from before to after the 3 min trotting test	temp_3min_post - temp_3min_pre	° C
temp_5min_diff	increase in rectal temperature from before to after the 5 min walking test	temp_5min_post - temp_5min_pre	° C
dog	study-ID of each dog, randomly generated combination of 2 letters and 2 digits
body_temp	rectal temperature measured at the initial clinical exam; needed for calibration		° C
weight	body weight of the dog		kg
position	position of the dog during the analyzed breath sequence		standing, sitting, laying
start_sequence	time of the video recording when selected breath sequence starts		min:s
end_sequence	time of the video recording when selected breath sequence ends		min:s
total_time	total time of the selected breath sequence		s
on_off_pattern	the order of breaths used for analysis and breaths not used for analysis within the total time		on = breaths used for analysis, off = breaths not used for analysis because either not recognized or dog moved during that breath
Te_Ti_Av	see above
Te_Ti_Sd	see above
Pef_Pif_Av	see above
Pef_Pif_Sd	see above
MV_BW_Av	see above
MV_BW_Sd	see above
f_Av	see above
f_Sd	see above
interruption_index	ratio of off-breaths to on-breaths	off / on
comments_position	additional comments on the dog's position during the analyzed sequence
movement	categories of subjective assessment of the dog's movement during the analyzed sequence		invisible = no noticeable movement; minimal = small movements that can be noticed, but are unlikely to have affected the shape of recorded breaths; moderate = some movement, may lead to exclusion of some breaths
breathing_pattern	subjective assessment of the dog's breathing pattern during the analyzed sequence
box_temp_min	lowest temperature inside the box during the analyzed sequence		° C
box_temp_max	highest temperature inside the box during the analyzed sequence		° C
humidity_min	lowest humidity inside the box during the analyzed sequence		%
humidity_max	highest humidity inside the box during the analyzed sequence		%
CO2_min	lowest CO2 concentration in the box during the analyzed sequence		%
CO2_max	highest CO2 concentration in the box during the analyzed sequence		%
grade_0	probability of BOAS grade 0 according to radarplot generated by Cambridge web application		%
grade_1	probability of BOAS grade 1 according to radarplot generated by Cambridge web application		%
grade_2	probability of BOAS grade 2 according to radarplot generated by Cambridge web application		%
grade_3	probability of BOAS grade 3 according to radarplot generated by Cambridge web application		%
BOAS_index	BOAS-Index * 100% gives the probability for that dog of being clinically affected by BOAS (i.e. grades 2 or 3) as predicted by the Cambridge web application
ET	BOAS grade assigned in the 3 min trotting test
result_plausible	are the radarplot and BOAS_index generated by the Cambridge web application consistent with the result of the trotting test?		yes, no, optional free text comments
trace_quality	subjective assessment of the trace of the analyzed breaths as displayed by the software to visualize the recorded breaths		not ideal, okay, good
flow_threshold	selected threshold for breath detection in calibration of the WBP chamber		ml/s
large_box	whether the dog was placed in the larger chamber (model PLY-361) or the smaller (model PLY-351)		1 = larger chamber, 0 = smaller chamber
